# Supplementary material for: Gingival status and prophylactic oral hygiene measures modulate salivary amino acids’ profile in children with plaque-induced gingivitis
Source: publisher site journal article supplement (doi:10.1515/tjb-2023-0107), 2023-08-08
Supplement: Supplementary file 1 [file j_tjb-2023-0107_suppl_001.docx]

Supplementary Figure 1: Study design. GI, gingival index (Löe and Silness); PLI, plaque index Silness-Löe.
